# 1 Subsurface microbial habitats in an extreme desert Mars-analogue environment

2

3 Kimberley A. Warren-Rhodes<sup>1,2</sup>, Kevin C. Lee<sup>3</sup>, Stephen D.J. Archer<sup>3</sup>, Donnabella C.  
4 Lacap-Bugler<sup>3</sup>, Linda Ng Boyle<sup>4</sup>, Nathalie Cabrol<sup>1,2</sup>, David Wettergreen<sup>5</sup>, Kris Zacny<sup>6</sup>,  
5 Cecilia Demargasso<sup>7</sup>, Jeff Moersch<sup>8</sup>, Guillermo Chong<sup>7</sup>, Srinivasan Vijayarangan<sup>5</sup>, Cinthya  
6 Tebes<sup>7</sup>, Michael Wagner<sup>5</sup>, Ken Tanaka<sup>9</sup>, Trent Hare<sup>9</sup>, Christopher Gayle Tate<sup>8</sup>, Alian  
7 Wang<sup>10</sup>, Jie Wei<sup>10</sup>, Greydon Foil<sup>5</sup> and Stephen B. Pointing<sup>11</sup>

8

9 <sup>1</sup> NASA Ames Research Center, Moffett Field, CA, USA.

10 <sup>2</sup> The SETI Institute, Mountain View, CA, USA

11 <sup>3</sup> School of Sciences, Auckland University of Technology, Auckland, New Zealand.

12 <sup>4</sup> College of Engineering, University of Washington, Seattle, WA, USA

13 <sup>5</sup> Institute of Robotics, Carnegie-Mellon University, Pittsburgh, PA, USA

14 <sup>6</sup> Honeybee Robotics and Spacecraft Mechanisms Corp, Pasadena, CA, USA

15 <sup>7</sup> Universidad Católica del Norte, Antofagasta, Chile

16 <sup>8</sup> Department of Earth and Planetary Science, University of Tennessee, Knoxville, TN, USA

17 <sup>9</sup> United States Geological Survey, Flagstaff, AZ, USA

18 <sup>10</sup> Department of Chemistry, Washington University, St. Louis, OH, USA

19 <sup>11</sup> Yale-NUS College and Department of Biological Sciences, National University of

20 Singapore, Singapore

21

22 **Summary**

Sediments in the hyper-arid core of the Atacama Desert represent one of the closest terrestrial analogues to Mars' regolith. Understanding the distribution and drivers of life in the sediment may thus give critical clues on how to search for biosignatures on Mars. Here, we identify the spatial distribution of highly specialised bacterial communities in previously unexplored depth horizons of subsurface sediments and their correlation with moisture and geochemical variables. We deployed an autonomous rover in a mission-relevant Martian drilling scenario with manual sample validation to recover and analyse sediments in two Mars-like terrains, a gravel desert pavement and an evaporite-rich playa. Subsurface communities were distinct from surface-associated communities and were delineated by depth related to sediment moisture. Geochemical analysis indicated soluble salts and mineralogy that influence water bio-availability, particularly in deeper sediments. Colonisation was also patchy and uncolonised sediment was associated with indicators of extreme osmotic challenge. Bacterial diversity reflected strong selection for halotolerant and desiccation tolerant taxa throughout depth horizons. The most diverse communities occurred within the zone of highest moisture, whereas deeper sediments were colonized by methylophilic taxa with limited diversity. The study provides important baseline microbial ecological data on the linkage between biocomplexity, moisture and geochemistry in Mars-like sediments at the limit of habitability and demonstrates feasibility of the rover-mounted drill for future Mars sample recovery.

## Introduction

1 The surface of Mars is dry, cold, and exposed to high levels of ionising radiation.  
 2 However, data accumulated over the past few decades by orbital and landed missions  
 3 have demonstrated that early in its history the planet may have been habitable for  
 4 microbial life with abundant sources of energy, carbon, nutrients, and shelter <sup>1</sup>. Mars  
 5 supported surface and subsurface water and may still do in some circumstances, as well  
 6 as organic molecules required for life <sup>2</sup>. As a result, Mars 2020 and ExoMars missions will  
 7 be searching for biosignatures <sup>3,4</sup>, and the investigation of terrestrial analogues can  
 8 provide critical insights for the development and testing of exploration strategies.  
 9 Among those, the hyper-arid core of the Atacama Desert in Chile is widely regarded as a  
 10 tractable Mars analogue in the field of astrobiology. The Atacama is the driest desert  
 11 region on Earth <sup>5</sup> with extremely low moisture inputs and precipitation events that are  
 12 stochastic in nature <sup>6</sup>. The region has a long history of climatic stability as an extreme  
 13 desert <sup>7,8</sup> resulting in the build-up of evaporates <sup>6,9</sup> and creation of a Mars-like surface.  
 14 The desert's hyper-arid core lies at or near the arid limit for soil formation <sup>10</sup> and thus  
 15 surface terrain in this region is regarded as sediment.

16 Animal and plant life are scarce in extreme deserts and instead cyanobacteria-  
 17 dominated microbial communities in mineral and rocky refugia including deliquescent  
 18 substrates comprise the dominant surface biota and are well-characterised <sup>11,12</sup>.  
 19 Conversely, evidence for microbial colonisation in hyper-arid Atacama sediment is  
 20 scarce, contradictory and almost exclusively limited to surface-associated sediment <sup>9,13–</sup>  
 21 <sup>17</sup> (Supplementary Material, Table S1). Cultivation-based approaches are unreliable as  
 22 indicators of environmental microbial diversity and have yielded estimates that varied

1 by several orders of magnitude <sup>9,14,15,17,18</sup>. Biochemical tests have similarly yielded  
 2 inconclusive support for microbial metabolic activity <sup>9,14–17</sup>. High throughput sequencing  
 3 of environmental DNA/RNA remains the most reliable indicator for microbial diversity in  
 4 extreme desert sediments. This approach has provided critical insight on surface-  
 5 associated communities in semi-arid, arid and hyper-arid locations <sup>16</sup>. A recent study  
 6 also estimated putative microbial metabolic activity in three subsurface samples after  
 7 an unusual rain event and this suggested subsurface sediment may also be a habitat for  
 8 microbial communities <sup>17</sup>. Major knowledge gaps persist, and importantly from an  
 9 astrobiology perspective the question of how microbial occurrence and diversity may  
 10 vary with abiotic variables in sediment depth horizons of a Mars analogue and spatially  
 11 within terrain, and whether this can be addressed in a simulated robotic sampling  
 12 mission scenario.

13 To document these questions and support the development and testing of  
 14 biosignature exploration strategies, the NASA-funded *Subsurface Life in the Atacama*  
 15 *Project* deployed an autonomous rover-mounted robotic drill in Mars-like desert  
 16 pavement and playa terrain within the hyper-arid core of the Atacama under  
 17 challenging environmental and logistical constraints (Supplementary Material, Fig. S1-  
 18 S3). The drill accessed 32 discrete sediment samples to depths of 800mm along a 50km  
 19 transect in a realistic simulation of Martian drilling operations and constraints. Over 60  
 20 manually excavated sediment samples were recovered in parallel and validated the  
 21 automated sampling for abiotic and biotic components of the sediment habitat and  
 22 provide important baseline ecological data on the most Mars-like sediments on Earth.

1

## 2 **Extreme habitats in Atacama sediment horizons**

3 The on-board Raman spectrometry revealed surface mineral distributions comprising  
4 feldspar and quartz. Subsurface sediments, and particularly the playa sites, were  
5 elevated in gypsum and anhydrite (Supplementary Material, Table S3, Fig. S5). This was  
6 independently corroborated by laboratory Raman measurements (Supplementary  
7 Material, Table S3) and geochemical analysis that revealed a positive linear correlation  
8 ( $r=0.78$ ,  $p<0.001$ ) across all samples between sulfate-sulfur and calcium, the  
9 components of gypsum and anhydrite ( $\text{CaSO}_4 +/-2\text{H}_2\text{O}$ ). Anhydrite is indicative of drier  
10 conditions at depth, and *in situ* soil moisture sensors validated this for horizons in both  
11 pavement and playa.

12 Our chemical analysis focused on geochemical reservoirs readily available and  
13 relevant to biological communities and using methodology that was comparable to  
14 other microbial ecology studies. A clear depth-dependent pattern in geochemistry was  
15 revealed for pavement and playa horizons (Fig. 1, Supplementary Material, Table S2, Fig.  
16 S4). Surface sediments were strongly associated with elevated phosphorous  
17 concentrations in both playa and pavement units (Fig. 1). Elevated surface P was  
18 attributed to presence of surface Fe-oxides and calcite that can adsorb P. These P  
19 adsorbing phases were likely present in the subsurface but were diluted by high sulfate  
20 concentrations causing lower recorded P concentrations below the surface. All  
21 subsurface samples displayed very low to undetectable levels of N and low C throughout  
22 horizons. The on-board Raman spectrometer also recorded C as a minor/undetectable

1 phase in all samples. Electrical conductivity (EC) and Na<sup>+</sup> levels increased with depth in  
2 both substrates indicating increased salinity with depth (p = 0.006). Desert pavement  
3 subsurface sediments separated mainly due to pH and K<sup>+</sup>, whilst playa subsurface  
4 sediments displayed elevated levels of sulfate-sulfur, extractable cations (Ca<sup>2+</sup>, Mg<sup>2+</sup>,  
5 Na<sup>+</sup>) and EC indicating increasing osmotic challenge, and most notably in the paleo-playa  
6 Site 10 (Fig. 1, Supplementary Material Table S2).

7 Average annual subsurface temperatures ranged from 19.9 – 20.9°C in depth  
8 horizons (Supplementary Material, Table S4). At shallow depths (<100mm) temperature  
9 varied between 4 – 34°C, whereas in deeper horizons temperature variation was  
10 somewhat buffered (Supplementary Material, Fig. S6). Moisture values from depth  
11 horizons in representative playa terrain were consistently higher (approximately 4- to 7-  
12 fold) at all depths than those in the desert pavement horizons (Supplementary Material,  
13 Table S4) and this likely reflects local hydrology given the playa was a relatively low-lying  
14 terrain (Supplementary Material, Fig. S1). However, sediment moisture trends in both  
15 substrates broadly indicated the existence of depth groupings into distinct moisture  
16 zones: (a) a surface zone consisting of the top 200mm, where water availability is  
17 typically lowest, except in the short-term following a rain event; (b) a mid-depth zone  
18 (300-500mm), where water availability peaks and persists after a rain event; and (c) a  
19 deep subsurface zone (≥500-800mm), where water availability is typically lower and,  
20 notably for the desert pavement sediments, appeared to be un-impacted by rare large  
21 rainfall events (Supplementary Material, Table S4, Fig. S6).

22

# **1 Depth-related trends in DNA recovery and microbial alpha diversity**

2 Surface colonisation was widespread in desert pavement and playa sites but subsurface  
3 horizons displayed patchy recovery with low yields of quantifiable DNA in the range  
4 0.067-6.5 ng/g sediment, indicating extremely low standing biomass (Supplementary  
5 Material, Table S2, S5). Notably, the paleo-playa site yielded no recoverable DNA at any  
6 depth after repeated efforts at extraction. Our approach using a DNA recovery method  
7 adapted for low-biomass extreme environments highlights for the first time the  
8 patchiness of low biomass microbial colonisation in the most extreme subsurface desert  
9 sediments where micro-habitat conditions are at or near the limit for life <sup>19</sup>. This may  
10 explain, at least in part, why some previous research has concluded this region of the  
11 Atacama was lifeless <sup>9</sup>. Linear Discriminant Analysis was employed to show that  
12 variables most strongly associated with potentially lifeless subsurface sediments where  
13 environmental DNA was irrecoverable were sulfate-sulfur (substrate) ( $p = 0.001$ ), depth  
14 ( $p = 0.003$ ), EC ( $p = 0.006$ ), soluble salts ( $p = 0.006$ ). This strongly suggests that osmotic  
15 challenge and limited moisture availability are the major extinction drivers in this Mars  
16 analogue sediment. We also demonstrated that substrate-inhibition of DNA recovery  
17 was unlikely to have been a significant factor, since bacterial cell suspensions in the  
18 range reported for desert soils (Supplementary Material, Table S1) added to these  
19 samples were recoverable with 60-80% efficiency compared to a pure laboratory culture  
20 and were not significantly inhibited compared to extractions with spiked sediments that  
21 did originally yield environmental DNA.

1 Across both terrains any given depth horizon tended to either be colonised  
2 almost throughout or display only patchy near-surface colonisation as measured by  
3 recoverable DNA. Thus, the ubiquitous surface colonisation was not a predictor for  
4 subsurface habitability in these sediments. We postulate that in addition to sediment  
5 moisture, extreme geochemistry also influenced habitability in these sediments as  
6 evidenced by high soluble salts/salinity indicators and abundance of anhydrite and  
7 gypsum mineral signatures (Supplementary Material, Table S2, S3). Temperature  
8 variations were not regarded as significant challenges to microbial colonisation  
9 compared to other variables (Supplementary Material, Fig. S6). The paleo-playa site 10  
10 failed to yield recoverable DNA from any depth, thus highlighting that ancient landforms  
11 created under moisture sufficiency, and with elevated anhydrite levels as indicated by  
12 the rover's Raman spectrometer (Supplementary Material, Fig. S5) may not support  
13 extant genetic biosignatures and do not support recoverable relic DNA. Our overall DNA  
14 recovery success was consistent with our expectations for the driest desert location on  
15 Earth. It is notable that we have observed Antarctic mineral sediments, another Mars  
16 analogue, generally yield higher recovery rates using similar methodologies, e.g. <sup>20,21</sup>.  
17 However, this is likely due to enhanced standing biomass due to the less extreme nature  
18 of the growing season in Antarctic desert where long periods of frozen hibernation are  
19 punctuated by periods of moisture sufficiency during the austral summer <sup>22</sup>.

20 Clear patterns were discernible from manually excavated sediment pits. Bacterial  
21 diversity decreased significantly with depth across both terrains (Chao1 richness:  $r =$   
22 0.508,  $p = 0.044$ ; Shannon's H:  $r = 0.731$ ,  $p = 0.001$ ), thus indicating depth as a major

1 driver of bacterial diversity (Supplementary Material, Fig. S8, Table S6). Bacterial  
 2 communities formed six diversity clusters that associated with clearly defined depth  
 3 ranges and zones of variability in sediment moisture and geochemistry (Fig. 2a).  
 4 Subsurface communities were more distinct between habitat types but also more  
 5 heterogenous overall than surface-associated communities, due largely to the lower  
 6 bacterial diversity within each depth-defined sediment micro-habitat. Community  
 7 evenness displayed little clear pattern with depth for desert pavement but for playa  
 8 deep samples displayed very low evenness reflecting their highly specialised diversity  
 9 (Supplementary Material, Table S6). In all cases the rover-acquired samples showed a  
 10 generally similar pattern in depth profile and diversity clusters although these were less  
 11 clearly defined and we attributed this to mixing of sediment during recovery using the  
 12 bite-drilling approach (Fig. 2b; Supplementary Material, Fig. S8).

13 To further unravel the influence of sediment environment on bacterial diversity,  
 14 we performed canonical correspondence analysis (CCA) to establish the association of  
 15 distinct geochemistry for desert pavement and playa samples on the assembly of  
 16 bacterial communities (Fig. 1). Surface communities were strongly influenced by P levels  
 17 that were elevated compared to the subsurface (Fig. 1). Bacterial diversity in subsurface  
 18 sediment habitats correlated with two groups of geochemical variables: The playa  
 19 subsurface community was strongly associated with EC and extractable cations ( $\text{Ca}^{2+}$ ,  
 20  $\text{Mg}^{2+}$ ,  $\text{Na}^+$ ) and the rover-mounted Raman data indicated elevated anhydrite and  
 21 gypsum (Supplementary Material, Table S3, Fig. S5). This strongly suggests that bio-  
 22 availability of water may be limited in this subsurface habitat despite relatively high

1 moisture levels due to the effects of salt saturation. Conversely the pavement  
 2 subsurface community was associated largely with pH, and also C and K<sup>+</sup> although the  
 3 magnitude of variation for these variables was low. This pH-dependent structuring of  
 4 microbial diversity is consistent with observations for global trends in soil microbial  
 5 diversity<sup>23</sup>. The BEST multiple rank correlation routine was employed to further  
 6 examine our data and rank the relative association of abiotic variables with the  
 7 observed bacterial diversity as follows: extractable cations (Ca<sup>2+</sup>, Mg<sup>2+</sup>, Na<sup>+</sup>) and  
 8 phosphorous>sulfate-sulfur> >EC ( $\rho w = 0.595-0.609$ ,  $p < 0.05$ ), thus further validating the  
 9 ordinations and CCA analysis.

10

# **11 Highly specialised sediment bacterial communities**

12 The taxa identified in sediment indicated highly specialised and relatively low diversity  
 13 bacterial communities in both desert pavement and playa, and this low diversity reflects  
 14 global trends in soil microbial diversity where deserts are considered to be relatively  
 15 depauperate<sup>24,25</sup>. Overall the drill samples yielded weaker depth resolution than  
 16 manual sampling but still corroborated observations from the manually collected  
 17 samples (Fig. 3, Supplementary Material Fig. S9). Bacterial taxonomic diversity varied  
 18 significantly with subsurface habitat as compared to a generally consistent surface  
 19 community (Fig. 3)<sup>16</sup>. Overall, communities were dominated largely by only three phyla:  
 20 Chloroflexi, Actinobacteria and Alphaproteobacteria.

21 All surface communities were dominated by the AKIW781 lineage of the  
 22 photoheterotrophic Chloroflexi, a known desert soil crust taxon (NCBI GenBank

1 accession number: JQ402146), and overall community structure contributed additional  
 2 taxonomic resolution to previous observations of surface sediment communities <sup>16,17</sup>.  
 3 AKIW781 has also been recorded in desert varnish on rock surfaces <sup>26</sup> as well as a  
 4 keystone taxon of hypolithic communities <sup>27</sup> in the Atacama. This indicates a  
 5 cosmopolitan distribution and broad habitat preference among surface niches in this  
 6 extreme desert. Conversely, the Chloroflexi were minor components of subsurface  
 7 communities, decreasing in relative abundance with depth, and mainly comprised an  
 8 uncharacterised candidate class Ellin6529, likely adapted to non-phototrophic  
 9 metabolism in the subsurface microhabitat.

10 Low and mid-depth subsurface horizons for both desert pavement and playa  
 11 were dominated by the low G-C gram positive taxonomic class Actinobacteria (Fig. 3,  
 12 Supplementary Material, Fig. S9). They are typically thick-walled bacteria commonly  
 13 encountered in soil. Communities encountered were specific to each depth horizon and  
 14 shifts in diversity clearly reflected the moisture zones identified for both pavement and  
 15 playa horizons. At shallow depths (<200mm) halotolerant, alkalotolerant, spore-forming  
 16 desiccation-tolerant actinobacterial groups were abundant and included the orders  
 17 acidimicrobiales, gaiellales, nitriliruptorales and solirubrobactales in desert pavement  
 18 and acidimicrobiales and nitriliruptorales in playa. Mid-depth sediments (300-<500 mm)  
 19 corresponding to the zone of greatest moisture availability in both substrates supported  
 20 highly variable bacterial diversity between samples and also the most diverse  
 21 communities (Supplementary Material, Table S6). Of note was the elevated relative  
 22 abundance of bacillales at a single pavement site and this may reflect the relatively high

1 altitude of this site and limited moisture input to the subsurface. The bacillales-  
 2 dominated community was more similar to those encountered at greater depths at  
 3 other locations. The bacillales are characterised by their ability to form highly resistant  
 4 endospores and so may indicate an increasingly challenging micro-habitat in deeper  
 5 subsurface sediments.

6       There were fewer deep sediment samples from which to make comparisons and  
 7 this reflected the more challenging subsurface environment, and deeper communities  
 8 (500+ mm) generally displayed lowest taxonomic diversity. The deepest desert  
 9 pavement community was similar to those at shallower depths but displayed elevated  
 10 relative abundance of acidimicrobiales. Conversely the deep playa community shifted to  
 11 a fundamentally different composition from shallower depths that was dominated  
 12 almost exclusively by a single facultative methylotrophic and desiccation-tolerant  
 13 *Methylobacterium radiotolerans* taxon (NCBI GenBank accession number: LT985974)  
 14 from the phylum Alphaproteobacteria. We speculate the C1 metabolism of this taxon  
 15 allows it to exploit simple C1 compounds as well as subsurface methane sources<sup>28</sup>, a  
 16 molecule known to be released from subsurface sources on Mars <sup>29</sup>. An overall picture  
 17 thus emerges of highly-specialised bacterial diversity adapted to and reflecting the  
 18 challenging subsurface habitat as well as reflecting moisture availability zones  
 19 determined at least in part by sediment depth and geochemistry.

20       Other bacteria typically encountered in desert surface communities and  
 21 generally regarded as tolerant to extreme conditions were not major components of  
 22 subsurface communities. A complete absence of cyanobacterial taxa was consistent

1 with their adaptation to surface mineral refugia rather than subsurface sediment  
 2 habitats that preclude photoautotrophy <sup>12</sup>, and the highly desiccation-tolerant  
 3 *Deinococcus*-*Thermus* group were represented by only a single lineage of Trueperaceae  
 4 candidate genus B-42 recovered in just a few subsurface samples with low abundance  
 5 (0.6 – 4.8%), compared to a relatively diverse assemblage of cultivable *Deinococci*  
 6 recovered from surface sediments in other less arid desert locations <sup>30</sup>. This further  
 7 supports our evidence for highly specialised subsurface communities selected for by the  
 8 distinct geochemistry and microclimate in the subsurface Mars analogue sediments of  
 9 the Atacama. They may thus be broadly indicative of the type of microbial consortia that  
 10 could exploit Martian subsurface habitats.

11 In the deepest and least-diverse playa communities biocomplexity was reduced  
 12 almost to a single taxon, reflecting extreme selective pressure and also highlighting a  
 13 possible lack of resilience to environmental change given that recruitment to deep  
 14 subsurface sediments may be limited. The minimum biocomplexity may comprise  
 15 multiple ecotypes of a single taxon, each adapted to exploit a given suite of  
 16 microclimate and geochemical conditions <sup>31</sup>. They likely exhibit a strong preference for  
 17 C1 and/or autotrophic taxa that are somewhat de-linked from their immediate  
 18 surroundings in terms of carbon sequestration and reflect the extreme oligotrophic  
 19 nature of these microhabitats. Given the highly specialised diversity recovered, the  
 20 association of putative physiology with environmental variables, and lack of DNA  
 21 recovery in paleo-playa samples; we conclude that our estimates are likely to represent  
 22 resident microbial communities rather than relic DNA<sup>17,32</sup>.

1

## 2 **Implications for detection of biosignatures on Mars**

3 The autonomous rover drilling platform yielded subsurface sediment samples that  
 4 allowed for the first time a combined investigation of sediment abiotic properties and  
 5 microbial diversity at an unprecedented level of detail. The parallel manual sampling  
 6 and analysis demonstrated feasibility and fidelity of the autonomous rover approach.  
 7 Highly specialised but low-diversity subsurface bacterial communities were encountered  
 8 patchily and this was strongly associated with abiotic variables which suggests that  
 9 “follow the water” is only part of the biosignature exploration solution in the search for  
 10 potential habitable refuges on Mars. Consideration of subsurface micro-habitat  
 11 variability in geochemistry, originating with and adapted to possible water availability  
 12 zones may also be key. Whilst the geochemistry of our analogue sites was similar to that  
 13 of a habitable Martian regolith, moisture in the Atacama is surface-sourced by fog  
 14 and/or rain events <sup>6</sup>, whereas on Mars subsurface sources may provide an upward  
 15 migration of moisture similar to that observed in Antarctic mineral sediment overlaying  
 16 permafrost <sup>33,34</sup>. Thus, extrapolating habitable subsurface locations on Mars would need  
 17 to consider this along with the incident radiation regime and other Martian  
 18 environmental variables. Based on the exploratory design consideration for this NASA-  
 19 funded research, drill depth was constrained at 800mm as a proof of concept study.  
 20 However, current plans are for both NASA and ESA to target depths of up to 2m on Mars  
 21 in order to target potential subsurface habitats that account for Martian environmental  
 22 variables.

1           The relevance of ecology and microbial habitats to past and possible extant life  
2   on Mars are finally coming to the fore in the robotic search for biosignatures on Mars  
3   <sup>1,35</sup>. As our study suggests, detecting such life or its residual biosignatures may prove  
4   highly challenging, given that in the most extreme deserts on Earth these communities  
5   are extremely patchy in distribution and occur with exceedingly low biomass. The drill  
6   apparatus employed in this study has demonstrated that subsurface sediment  
7   biosignatures can be autonomously recovered, although precise depth delineation  
8   requires refinement with the bite-drilling approach used in this study. Whilst genetic  
9   biosignatures such as DNA used in our study may not ultimately be the primary method  
10   employed to search for traces of life on Mars, they are the most reliable and widely  
11   used method currently available for microbial diversity estimation <sup>24,25</sup>. This approach  
12   provided essential first proof of concept that an incontrovertible biological signature  
13   within the likely range for geochemical variables in a habitable subsurface environment  
14   can be recovered from a Mars-like sediment using an autonomous rover.

15

## 16   **Methods**

17   A detailed description of all field and experimental approaches is presented in the  
18   Supplementary Material. Briefly, the automated rover completed a 50km traverse and  
19   used a robotic drill to sample subsurface sediments in depth horizons to 800mm. On-  
20   board mineralogical characterisation was achieved using Raman spectroscopy and  
21   samples were recovered for further laboratory geochemical analysis and estimation of  
22   bacterial diversity from sequencing of environmental DNA. Parallel manually excavated

1 samples were recovered for validation of rover-acquired sampling, and the first detailed  
 2 characterisation of subsurface bacterial habitats in the Mars analogue sediment.  
 3 Automated microclimate recording was achieved using dataloggers deployed *in situ* in  
 4 the depth horizons.

5

## 6 **References**

- 7 1. Cabrol, N. A. The Coevolution of Life and Environment on Mars: An Ecosystem  
 8 Perspective on the Robotic Exploration of Biosignatures. *Astrobiology* **18**, 1–27  
 9 (2018).
- 10 2. Martin-Torres, F. J. *et al.* Transient liquid water and water activity at Gale crater  
 11 on Mars. *Nat. Geosci* **8**, 357–361 (2015).
- 12 3. Vago, J. L. *et al.* Habitability on Early Mars and the Search for Biosignatures with  
 13 the ExoMars Rover. *Astrobiology* **17**, 471–510 (2017).
- 14 4. Farley, K. & Williford, K. Seeking Signs of Life and More: NASA’s Mars 2020  
 15 Mission. *EOS Trans. - Am. Geophys. Union* **98**,  
 16 <https://doi.org/10.1029/2017EO066153> (2017).
- 17 5. Peel, M. C. & Finlayson, B. L. Updated world map of the Köppen-Geiger climate  
 18 classification. *Hydrol. Earth Syst. Sci.* **11**, 1633–1644 (2007).
- 19 6. McKay, C. P. *et al.* Temperature and Moisture Conditions for Life in the Extreme  
 20 Arid Region of the Atacama Desert: Four Years of Observations Including the El  
 21 Nino of 1997-1998. *Astrobiology* **3**, 393–406 (2003).
- 22 7. Clarke, J. D. A. Antiquity of aridity in the Chilean Atacama Desert. *Geomorphology*

- 1           **73**, 101–114 (2006).
- 2    8.     Hartley, A. J., Chong, G., Houston, J. & Mather, A. E. 150 million years of climatic  
3           stability: evidence from the Atacama Desert, northern Chile. *J. Geol. Soc. London*.  
4           **162**, 421–424 (2005).
- 5    9.     Navarro-Gonzalez, R. *et al.* Mars-like soils in the Atacama Desert, Chile, and the  
6           dry limit of microbial life. *Science* **302**, 1018–1021 (2003).
- 7    10.    Ewing, S. A. *et al.* A threshold in soil formation at Earth’s arid–hyperarid  
8           transition. *Geochim. Cosmochim. Acta* **70**, 5293–5322 (2006).
- 9    11.    Pointing, S. B. & Belnap, J. Microbial colonization and controls in dryland systems.  
10          *Nat. Rev. Microbiol.* **10**, 551–562 (2012).
- 11   12.    Azua-Bustos, A., Urrejola, C. & Vicuña, R. Life at the dry edge: Microorganisms of  
12          the Atacama Desert. *FEBS Lett.* **586**, 2939–2945 (2012).
- 13   13.    Drees, K. P. *et al.* Bacterial community structure in the hyperarid core of the  
14          Atacama Desert, Chile. *Appl Env. Microbiol* **72**, 7902–7908 (2006).
- 15   14.    Connon, S. S. A., Lester, E. D. E., Shafaat, H. H. S., Obenhuber, D. C. & Ponce, A.  
16          Bacterial diversity in hyperarid Atacama Desert soils. *J Geophys Res - Biogeosci*  
17          **112**, G04S17 (2007).
- 18   15.    Lester, E. D., Satomi, M. & Ponce, A. Microflora of extreme arid Atacama Desert  
19          soils. *Soil Biol. Biochem.* **39**, 704–708 (2007).
- 20   16.    Crits-Christoph, A. *et al.* Colonization patterns of soil microbial communities in  
21          the Atacama Desert. *Microbiome* **1**, 28 (2013).
- 22   17.    Schulze-Makuch, D. *et al.* Transitory microbial habitat in the hyperarid Atacama

- 1 Desert. *Proc. Natl. Acad. Sci. U. S. A.* **115**, 2670–2675 (2018).
- 2 18. Bagaley, D. R. Uncovering bacterial diversity on and below the surface of a hyper-  
3 arid environment, The Atacama Desert, Chile. (Louisiana State University, 2006).
- 4 19. McKay, C. P. Requirements and limits for life in the context of exoplanets. *Proc.*  
5 *Natl. Acad. Sci. U. S. A.* **111**, 12628–33 (2014).
- 6 20. Pointing, S. B. *et al.* Highly specialized microbial diversity in hyper-arid polar  
7 desert. *Proc. Natl. Acad. Sci. U. S. A.* **106**, 19964–19969 (2009).
- 8 21. Lee, C. K. *et al.* The Inter-Valley Soil Comparative Survey: the ecology of Dry Valley  
9 edaphic microbial communities. *ISME J* **6**, 1046–1057 (2012).
- 10 22. Pointing, S. S. B. *et al.* Biogeography of photoautotrophs in the high polar biome.  
11 *Front. Plant Sci. Funct. Plant Ecol.* **6**, 692 (2015).
- 12 23. Fierer, N. & Jackson, R. B. The diversity and biogeography of soil bacterial  
13 communities. *Proc. Natl. Acad. Sci. U. S. A.* **103**, 626–631 (2006).
- 14 24. Thompson, L. R. *et al.* A communal catalogue reveals Earth’s multiscale microbial  
15 diversity. *Nature* **551**, 457–463 (2017).
- 16 25. Delgado-Baquerizo, M. *et al.* A global atlas of the dominant bacteria found in soil.  
17 *Science.* **359**, 320–325 (2018).
- 18 26. Kuhlman, K. R., Venkat, P., La Duc, M. T., Kuhlman, G. M. & McKay, C. P. Evidence  
19 of a microbial community associated with rock varnish at Yungay, Atacama  
20 Desert, Chile. *J. Geophys. Res.* **113**, G04022 (2008).
- 21 27. Lacap, D. C., Warren-Rhodes, K. A., McKay, C. P. & Pointing, S. B. Cyanobacteria  
22 and chloroflexi-dominated hypolithic colonization of quartz at the hyper-arid core

- 1 of the Atacama Desert, Chile. *Extremophiles* **15**, 31–8 (2011).
- 2 28. Kao, Y. *et al.* Scale-dependent key drivers controlling methane oxidation potential  
3 in Chinese grassland soils. *Soil Biol. Biochem.* **111**, 104–114 (2017).
- 4 29. Stevens, A. H., Patel, M. R. & Lewis, S. R. Modelled isotopic fractionation and  
5 transient diffusive release of methane from potential subsurface sources on  
6 Mars. *Icarus* **281**, 240–247 (2017).
- 7 30. Rainey, F. A. *et al.* Extensive diversity of ionizing-radiation-resistant bacteria  
8 recovered from Sonoran Desert soil and description of nine new species of the  
9 genus *Deinococcus* obtained from a single soil sample. *Appl. Environ. Microbiol.*  
10 **71**, 5225–5235 (2005).
- 11 31. Koeppe, A. *et al.* Identifying the fundamental units of bacterial diversity: a  
12 paradigm shift to incorporate ecology into bacterial systematics. *Proc. Natl. Acad.*  
13 *Sci. U. S. A.* **105**, 2504–9 (2008).
- 14 32. Carini, P. *et al.* Relic DNA is abundant in soil and obscures estimates of soil  
15 microbial diversity. *Nat. Microbiol.* **2**, 16242 (2016).
- 16 33. Goordial, J. *et al.* Nearing the cold-arid limits of microbial life in permafrost of an  
17 upper dry valley, Antarctica. *ISME J.* **10**, 1613–1624 (2016).
- 18 34. Stomeo, F. *et al.* Abiotic factors influence microbial diversity in permanently cold  
19 soil horizons of a maritime-associated Antarctic Dry Valley. *FEMS Microbiol Ecol*  
20 **82**, 326–340 (2012).
- 21 35. Warren-Rhodes, K. *et al.* Robotic ecological mapping: Habitats and the search for  
22 life in the Atacama Desert. *J. Geophys. Res. Biogeosciences* **112**, (2007).

1

## 2 **Acknowledgements**

3 The work was completed with funding from NASA Astrobiology Science and Technology  
4 for Exploring Planets (ASTEP) Program Grant NNX11AJ87G and a Yale-NUS College Start-  
5 Up Grant. The authors are grateful to Brad Sutter (NASA) for advice on interpretation of  
6 geochemical analysis, and Craig Cary (University of Waikato) for assistance with  
7 biosecurity compliance and sample custody.

8

## 9 **Author contributions**

10 K.A.W-R., N.C. and S.B.P. conceived the study; D.W., K.Z., S.V., M.W. and G.F. built and  
11 operated the rover; K.A.W-R.; C.D., J.M., G.C., C.T., K.T., T.H., C.G.T., A.W. and J.W.  
12 conducted field operations and sampling; K.C.L., S.D.J.A., D.C.L-B. and S.B.P. processed  
13 sediment samples and conducted geochemical analysis; S.D.J.A. and K.C.L. conducted  
14 molecular biology experiments; K.A.W-R, K.C.L., S.D.J.A., D.C.L-B, L.N-B. and S.B.P.  
15 performed data analysis; K.A.W-R. and S.B.P. wrote the manuscript with inputs from  
16 K.C.L., S.D.J.A., D.W. and N.C. (K.A.W-R. and K.C.L. contributed equally).

17

## 18 **Materials & Correspondence**

19 Correspondence and requests for materials should be addressed to K.A.W-R Email:  
20 [krhodes@seti.org](mailto:krhodes@seti.org) or S.B.P. Email: [stephen.pointing@yale-nus.edu.sg](mailto:stephen.pointing@yale-nus.edu.sg)

21

# Figure 1. Correlation of Mars analogue sediment geochemistry with bacterial diversity.

Canonical Correspondence Analysis (CCA) triplot with symmetrical scaling indicating differences in sediment geochemistry within sediment pits, and influence of these abiotic variables on bacterial communities and individual taxa. The three most abundant taxa are labelled (A, B, C). The circle size of each sample indicates species richness index (Chao 1) of the respective community.

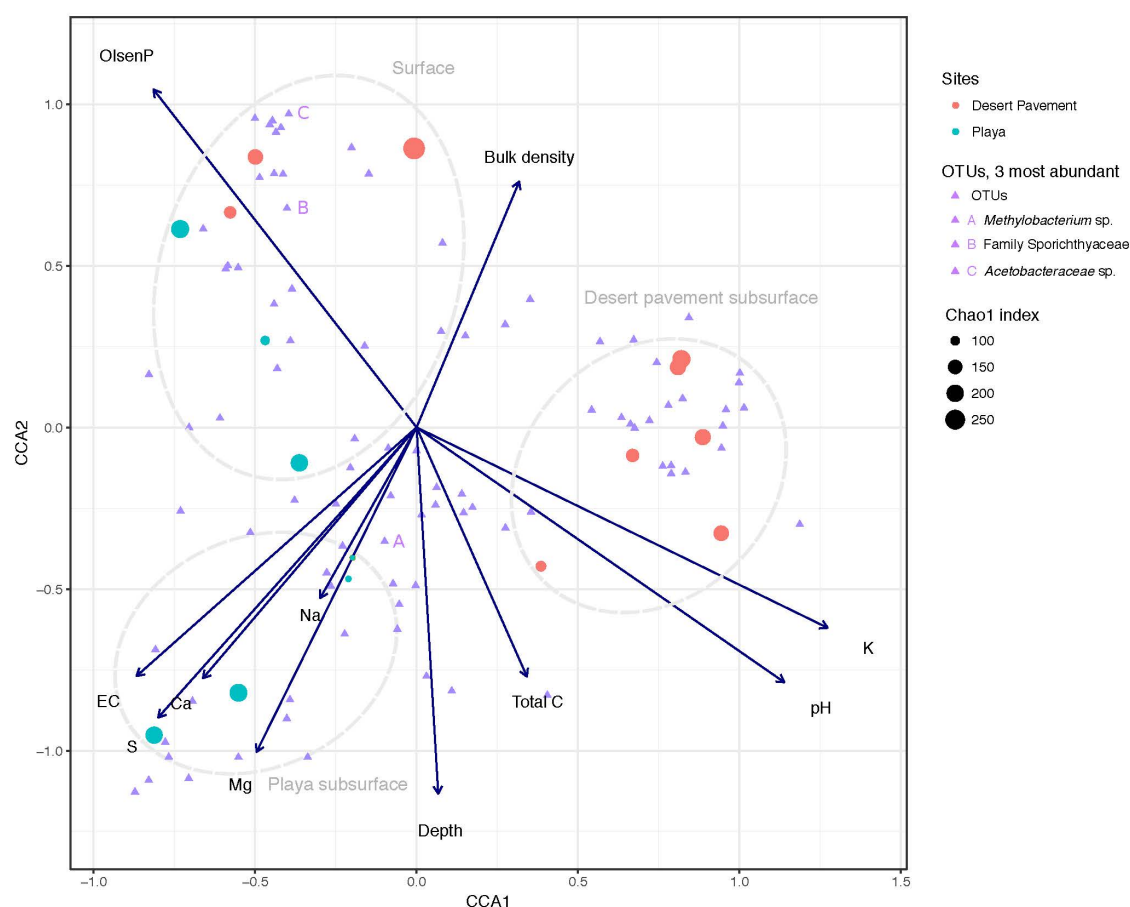

1 **Figure 2. Depth-defined bacterial diversity in Mars analogue sediments of the**  
2 **Atacama Desert.** Non-metric multidimensional scaling (NMDS) ordination of Bray Curtis  
3 similarities for bacterial diversity versus sediment depth from a) manual recovery, and  
4 b) rover recovery. Shaded areas indicate similarity clusters for sediment communities at  
5 the same depth. The size of each symbol (circle or triangle) indicates species richness  
6 index (Chao 1) of the respective community. Mid-range values were used for drill  
7 samples where depth ranges instead of individual depths were generated.

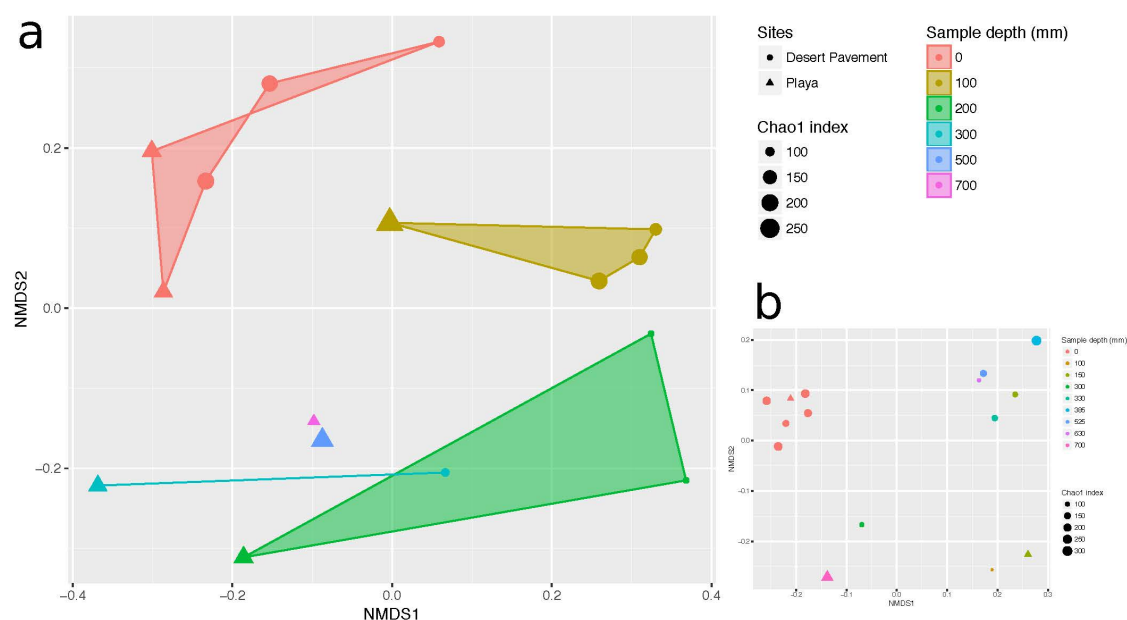

**Figure 3. Highly specialised bacterial communities in Mars analogue sediment depth horizons.** Distribution of bacterial diversity by taxonomic class with sediment depth for manual (M) and autonomous rover drill (D) recovered samples. Coloured shading indicates relative abundance within each community for a given bacterial class. Grey shading indicates no recoverable bacteria.

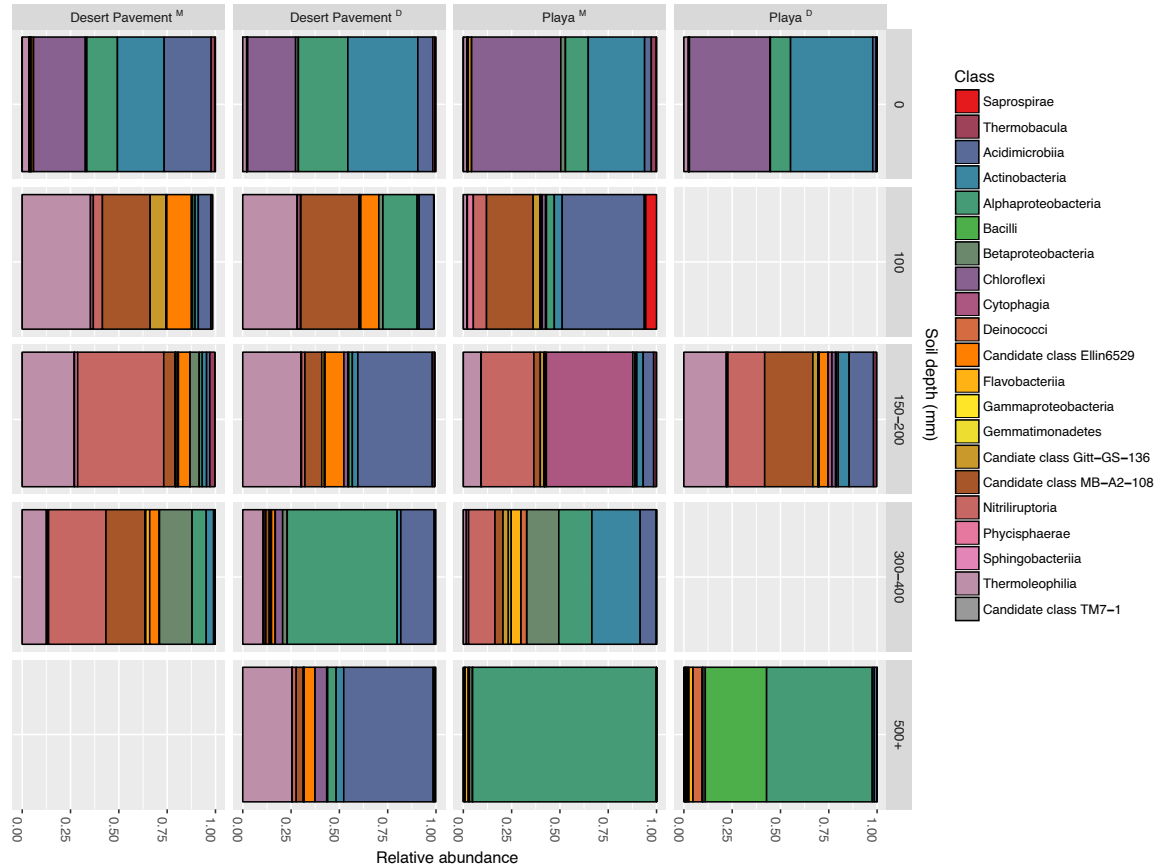

Source: https://www.biorxiv.org/content/10.1101/269605v3.full.pdf
